# Supplementary material
Source: publisher site journal article supplement (https://www.dovepress.com/article/594779)
Supplement: Supplementary file 1 [file Supplementary%20material.docx]

**Supplementary Table S1. Semi-structured Interview Guide for Patients Recovering from Pancreatitis.**

| **Domain** | **Example Questions** | **Theoretical Basis / Rationale** |
| --- | --- | --- |
| Understanding of diet–disease relationship | What do you think causes pancreatitis? How do you think diet affects your recovery? Have you noticed any foods that make your symptoms worse or better? | Explore patients’ cognitive perceptions of diet and illness, consistent with Health Belief Model (HBM) concepts of perceived susceptibility and severity. |
| Experiences of dietary management | How do you currently manage your diet? Can you describe any difficulties you have faced following a low-fat diet? What kinds of support or information have you received about diet? | Identify self-management behaviors and barriers; assess self-efficacy and behavioral capability. |
| Information sources and perceived reliability | Where did you learn about what to eat after discharge? Which sources do you trust most? Have you ever encountered conflicting information? | Assess health information literacy and source credibility. |
| Educational needs and expectations | What kind of dietary guidance do you expect from healthcare providers? How do you prefer to receive education ? What would make it easier for you to follow the recommended diet? | Explore unmet educational needs and preferred education formats. |
| Family and psychosocial influences | How does your family support or influence your dietary management? Have family eating habits affected your diet control? How do you feel emotionally when managing your diet? | Capture family dynamics and emotional factors influencing adherence. |
